# Supplementary material for: Enzymatic approach to cascade synthesis of bis(indolyl)methanes in pure water
Source: Royal Society of Chemistry journal article supplement (doi:10.1039/c9ra10014h), 2020-01-01
Supplement: c9ra10014h1.pdf [file c9ra10014h1.pdf]

### Synthesis of Bis(indolyl)methanes; Typical Procedure for 3a:

A mixture of indole (0.2341g, 2mmol), 4-chlorobenzaldehyde (0.1406g, 1mmol) and TLIM (10mg) in pure water (5 mL) was stirred at 55°C. The progress of the reaction was monitored by TLC (ethyl acetate-petroleum ether, 1:2). Upon completion of the reaction, the reaction mixture was filtered, and the residue achieved was then dissolved in 1, 4-dioxane (10mL) to separate the product and TLIM. By simple filtration, the immobilized biocatalyst TLIM was recovered and applied to the next run directly. After evaporation, to recover 1, 4-dioxane, the crude products could be obtained and further purified by column chromatography (eluent, ethyl acetate -petroleum ether, 1/3) on silica gel (200-300mesh).

#### 3,3'-((4-chlorophenyl)methylene)bis(1H-indole)(3a):

Yield: 0.93mmol (93%); red solid; m p 76°C-77°C.

<sup>1</sup>H NMR (300 MHz, CDCl<sub>3</sub>) δ 7.92 (s, 2H), 7.35 (dd, *J* = 8.1, 2.7 Hz, 4H), 7.29 – 7.21 (m, 4H), 7.20 – 7.12 (m, 2H), 7.10 – 6.91 (m, 2H), 6.62 (dd, *J* = 2.4, 1.0 Hz, 2H), 5.85 (s, 1H).

<sup>13</sup>C NMR (75 MHz, CDCl<sub>3</sub>) δ 138.9, 131.2, 129.8, 128.6, 127.8, 127.2, 121.2, 121.0, 119.7, 119.2, 112.2, 111.6, 34.8.

HRMS (EI-TOF): *m/z* Calcd. for C<sub>23</sub>H<sub>17</sub>ClN<sub>2</sub>[M+Na]<sup>+</sup>:356.8511, found 356.8514.

#### 3,3'-((3-nitrophenyl)methylene)bis(1H-indole)(3b):

Yield: 0.85mmol (85%); orange solid; m p 86°C-87°C.

<sup>1</sup>H NMR (300 MHz, CDCl<sub>3</sub>) δ 10.01 (s, 2H), 8.11 (s, 1H), 7.98 (d, *J* = 8.1 Hz, 1H), 7.88 (s, 1H), 7.59 (d, *J* = 7.7 Hz, 1H), 7.32 (dd, *J* = 14.6, 6.7 Hz, 2H), 7.25 (d, *J* = 6.6 Hz, 2H), 7.09 (t, *J* = 7.5 Hz, 2H), 6.92 (t, *J* = 7.6 Hz, 2H), 6.56 (s, 2H), 5.89 (s, 1H).

<sup>13</sup>C NMR (75 MHz, CDCl<sub>3</sub>) δ 148.3, 137.8, 133.2, 129.9, 127.8, 127.2, 125.7, 121.5, 121.2, 121.0, 119.7, 119.2, 112.2, 111.6, 34.7.

HRMS (EI-TOF): *m/z* Calcd. for C<sub>23</sub>H<sub>17</sub>N<sub>3</sub>O<sub>2</sub>[M+Na]<sup>+</sup>:367.4009, found 367.3998.

#### 3,3'-((4-nitrophenyl)methylene)bis(1H-indole)(3c):

Yield: 0.87mmol (87%); orange solid; m p 220°C-222°C.

<sup>1</sup>H NMR (300 MHz, CDCl<sub>3</sub>) δ 8.14. (d, *J* = 8.6 Hz, 2H), 8.02 (s, 2H), 7.51 (d, *J* = 8.5 Hz, 2H), 7.36 (dd, *J* = 14.8, 8.0 Hz, 4H), 7.20 (t, *J* = 7.5 Hz, 2H), 7.03 (t, *J* = 7.5 Hz, 2H), 6.69 (s, 2H), 5.99 (s, 1H).

HRMS (EI-TOF): *m/z* Calcd. for C<sub>23</sub>H<sub>17</sub>N<sub>3</sub>O<sub>2</sub>[M+Na]<sup>+</sup>:367.4011, found 367.3999.

#### 3,3'-((2-fluorophenyl)methylene)bis(1H-indole)(3d):

Yield: 0.99mmol (99%); red solid; m p 76°C-77°C.

<sup>1</sup>H NMR (300 MHz, CDCl<sub>3</sub>) δ 7.93 (s, 2H), 7.38 (dd, *J* = 13.0, 8.1 Hz, 4H), 7.24 – 7.13 (m, 4H), 7.09 (d, *J* = 9.6 Hz, 1H), 7.00 (q, *J* = 6.9, 6.1 Hz, 3H), 6.73 (s, 2H), 6.23 (s, 1H).

<sup>13</sup>C NMR (75 MHz, CDCl<sub>3</sub>) δ 160.2, 158.2, 137.5, 129.8, 129.6, 128.6, 127.4, 125.6, 122.7, 121.2, 119.2, 115.4, 114.3, 111.6, 30.8.

HRMS (EI-TOF): *m/z* Calcd. for C<sub>23</sub>H<sub>17</sub>N<sub>2</sub>F [M+Na]<sup>+</sup>:340.3921, found 340.3930.

#### 4-(di(1H-indol-3-yl)methyl)benzotrile(3e):

Yield: 0.98mmol (98%); red solid; m p 215°C-217°C.

<sup>1</sup>H NMR (300 MHz, CDCl<sub>3</sub>) δ 8.00 (s, 2H), 7.57 (d, *J* = 8.2 Hz, 2H), 7.45 (d, *J* = 8.1 Hz, 2H), 7.36 (dd, *J* = 14.4, 8.1 Hz, 4H), 7.20 (t, *J* = 7.6 Hz, 2H), 7.03 (t, *J* = 7.5 Hz, 2H), 6.67 (s, 2H), 5.94 (s, 1H).

$^{13}\text{C}$  NMR (75 MHz,  $\text{CDCl}_3$ )  $\delta$  149.8 , 136.7 , 132.1 , 129.5 , 126.7 , 123.6 , 122.2 , 119.6 , 119.5 , 119.2 , 118.2 , 111.2 , 110.0 , 40.4 .

HRMS (EI-TOF):  $m/z$  Calcd. for  $\text{C}_{23}\text{H}_{17}\text{N}_3[\text{M}+\text{Na}]^+$ :335.1430, found 335.1499.

**3,3'-(phenylmethylene)bis(1H-indole)(3f):**

Yield: 0.98mmol (98%); red solid; m p 124°C-126°C.

$^1\text{H}$  NMR (300 MHz,  $\text{CDCl}_3$ )  $\delta$  7.88 (s, 2H), 7.48 – 7.33 (m, 6H), 7.30 (d,  $J$  = 7.0 Hz, 2H), 7.23 – 7.13 (m, 3H), 7.01 (t,  $J$  = 7.4 Hz, 2H), 6.65 (s, 2H), 5.90 (s, 1H).

HRMS (EI-TOF):  $m/z$  Calcd. for  $\text{C}_{23}\text{H}_{18}\text{N}_2[\text{M}+\text{Na}]^+$ :322.4013, found 322.4019.

**3,3'-(p-tolylmethylene)bis(1H-indole)(3g):**

Yield: 0.95mmol (95%); orange solid; m p 97°C-99°C.

$^1\text{H}$  NMR (300 MHz,  $\text{CDCl}_3$ )  $\delta$  7.66 (s, 2H), 7.42 (d,  $J$  = 7.8 Hz, 2H), 7.26 (t,  $J$  = 7.3 Hz, 4H), 7.18 (t,  $J$  = 7.4 Hz, 2H), 7.10 (d,  $J$  = 7.7 Hz, 2H), 7.03 (t,  $J$  = 7.3 Hz, 2H), 6.54 (s, 2H), 5.86 (s, 1H), 2.35 (s, 3H).

$^{13}\text{C}$  NMR (75 MHz,  $\text{CDCl}_3$ )  $\delta$  141.0 , 136.7 , 135.4 , 128.9 , 128.5 , 127.1 , 126.1 , 123.5 , 121.8 , 119.9 , 119.2 , 111.0 , 39.8 , 21.0 .

HRMS (EI-TOF):  $m/z$  Calcd. for  $\text{C}_{24}\text{H}_{20}\text{N}_2[\text{M}+\text{Na}]^+$ :336.4313, found 336.4311.

**3,3'-(4-methoxyphenyl)methylene)bis(1H-indole)(3h):**

Yield: 0.95mmol (95%); red solid; m p 187°C-189°C

$^1\text{H}$  NMR (300 MHz,  $\text{CDCl}_3$ )  $\delta$  7.92 (s, 2H), 7.37 (dd,  $J$  = 14.3, 8.1 Hz, 4H), 7.25 (d,  $J$  = 6.3 Hz, 2H), 7.16 (t,  $J$  = 7.5 Hz, 2H), 7.00 (t,  $J$  = 7.5 Hz, 2H), 6.82 (d,  $J$  = 8.5 Hz, 2H), 6.64 (s, 2H), 5.84 (s, 1H), 3.78 (s, 3H).

HRMS (EI-TOF):  $m/z$  Calcd. for  $\text{C}_{24}\text{H}_{20}\text{N}_2\text{O}[\text{M}+\text{Na}]^+$ :352.4322, found 352.4310.

**4-(di(1H-indol-3-yl)methyl)-2-methoxyphenol(3i):**

Yield: 0.88mmol (88%); red solid; m p 113°C-115°C.

$^1\text{H}$  NMR (300 MHz,  $\text{CDCl}_3$ )  $\delta$  7.87 (s, 2H), 7.42 (d,  $J$  = 7.9 Hz, 2H), 7.32 (d,  $J$  = 8.1 Hz, 2H), 7.18 (t,  $J$  = 7.5 Hz, 2H), 7.02 (t,  $J$  = 7.4 Hz, 2H), 6.90 (s, 1H), 6.83 (s, 2H), 6.60 (s, 2H), 5.83 (s, 1H), 3.74 (s, 3H), 2.08 (s, 1H).

HRMS (EI-TOF):  $m/z$  Calcd. for  $\text{C}_{24}\text{H}_{20}\text{N}_2\text{O}_2[\text{M}+\text{Na}]^+$ :368.4335, found 368.4373.

**2-(di(1H-indol-3-yl)methyl)-6-methoxyphenol(3j):**

Yield: 0.88mmol (88%); red solid; m p 225°C-226°C.

$^1\text{H}$  NMR (300 MHz,  $\text{CDCl}_3$ )  $\delta$  7.88 (s, 2H), 7.45 (d,  $J$  = 7.9 Hz, 2H), 7.33 (d,  $J$  = 8.1 Hz, 2H), 7.15 (t,  $J$  = 7.5 Hz, 2H), 7.00 (t,  $J$  = 7.4 Hz, 2H), 6.78 (dd,  $J$  = 9.9, 2.7 Hz, 1H), 6.74 (d,  $J$  = 3.1 Hz, 1H), 6.70 (s, 2H), 6.30 (s, 1H), 5.83 (s, 1H), 3.89 (s, 3H), 2.05 (s, 1H).

HRMS (EI-TOF):  $m/z$  Calcd. for  $\text{C}_{24}\text{H}_{20}\text{N}_2\text{O}_2[\text{M}+\text{Na}]^+$ :368.4371, found 368.4373.

**3,3'-(butane-1,1-diyl)bis(1H-indole)(3k):**

Yield: 0.87mmol (87%); orange solid; m p 153°C-155°C.

$^1\text{H}$  NMR (300 MHz,  $\text{CDCl}_3$ )  $\delta$  7.57 (s, 2H), 7.46 (d,  $J$  = 7.8 Hz, 2H), 7.10 (t,  $J$  = 10.0 Hz, 2H), 7.00 (t,  $J$  = 7.4 Hz, 2H), 6.89 (p,  $J$  = 8.9, 8.4 Hz, 2H), 6.81 – 6.56 (m, 2H), 4.34 (t,  $J$  = 7.4 Hz, 1H), 2.05 (q,  $J$  = 7.5 Hz, 2H), 1.27 (dt,  $J$  = 18.0, 9.3 Hz, 2H), 0.82 (t,  $J$  = 7.3 Hz, 3H).

$^{13}\text{C}$  NMR (75 MHz,  $\text{CDCl}_3$ )  $\delta$  136.6 , 127.2 , 121.7 , 121.5 , 120.5 , 119.7 , 119.0 , 111.1 , 38.2 , 33.7 , 21.4 , 14.2 .

HRMS (EI-TOF):  $m/z$  Calcd. for  $\text{C}_{20}\text{H}_{20}\text{N}_2$   $[\text{M}+\text{Na}]^+$ :288.3942, found 288.4051.

**3,3'-(ethane-1,1-diyl)bis(1H-indole) (3l) :**

Yield: 0.75mmol(75%); white solid; m p 157°C-158°C.

$^1\text{H}$  NMR (300 MHz, Chloroform-*d*)  $\delta$  7.89 (s, 2H), 7.63 (d,  $J$  = 7.8 Hz, 2H), 7.36 (d,  $J$  = 8.1 Hz, 2H), 7.22 – 7.18 (m, 2H), 7.13 – 7.07 (m, 2H), 6.97 – 6.90 (m, 2H), 4.26 (d,  $J$  = 1.2 Hz, 1H), 0.08 (s, 3H).

HRMS (EI-TOF):  $m/z$  Calcd. for  $\text{C}_{18}\text{H}_{16}\text{N}_2$   $[\text{M}+\text{Na}]^+$ :260.3315, found 260.3310.

**3,3'-(thiophen-2-ylmethylene)bis(1H-indole)(3m):**

Yield: 0.89mmol (89%); pink solid; m p 150°C-152°C.

$^1\text{H}$  NMR (300 MHz,  $\text{CDCl}_3$ )  $\delta$  7.90 (s, 2H), 7.47 (d,  $J$  = 7.9 Hz, 2H), 7.35 (d,  $J$  = 8.1 Hz, 2H), 7.24 – 7.12 (m, 3H), 7.04 (t,  $J$  = 7.4 Hz, 2H), 6.92 (d,  $J$  = 4.5 Hz, 2H), 6.84 (s, 2H), 6.17 (s, 1H).

$^{13}\text{C}$  NMR (75 MHz,  $\text{CDCl}_3$ )  $\delta$  147.6 , 135.5 , 125.7 , 125.4 , 124.1 , 122.6 , 122.1 , 121.0 , 118.7 , 118.6 , 118.3 , 110.1 , 34.3.

HRMS (EI-TOF):  $m/z$  Calcd. for  $\text{C}_{21}\text{H}_{12}\text{N}_2\text{S}$   $[\text{M}+\text{Na}]^+$ :324.0710, found 324.0796.

**3,3'-((1H-pyrrol-2-yl)methylene)bis(1H-indole)(3n):**

Yield: 0.72mmol (72%); light yellow solid; m p 208°C-210°C.

$^1\text{H}$  NMR (300 MHz,  $\text{CDCl}_3$ )  $\delta$  8.59 (d,  $J$  = 4.2 Hz, 1H), 8.06 (s, 2H), 7.60 (t,  $J$  = 8.3 Hz, 1H), 7.37 (dd,  $J$  = 15.3, 8.0 Hz, 5H), 7.15 (q,  $J$  = 5.5, 3.8 Hz, 3H), 7.00 (t,  $J$  = 7.4 Hz, 2H), 6.82 – 6.77 (m, 2H), 6.08 (s, 1H).

HRMS (EI-TOF):  $m/z$  Calcd. for  $\text{C}_{22}\text{H}_{17}\text{N}_2$   $[\text{M}+\text{Na}]^+$ :309.1412, found 309.1417.

**3,3'-((4-(tert-butyl)phenyl)methylene)bis(1H-indole)(3o):**

Yield: 0.95mmol (95%); red solid; m p 70°C-72°C.

$^1\text{H}$  NMR (300 MHz,  $\text{CDCl}_3$ )  $\delta$  7.59 (s, 2H), 7.39 (d,  $J$  = 7.8 Hz, 2H), 7.35 – 7.18 (m, 6H), 7.13 (t,  $J$  = 7.4 Hz, 2H), 6.98 (t,  $J$  = 7.4 Hz, 2H), 6.50 (s, 2H), 5.83 (s, 1H), 1.30 (s, 9H).

$^{13}\text{C}$  NMR (75 MHz,  $\text{CDCl}_3$ )  $\delta$  148.7 , 140.8 , 136.7 , 128.2 , 127.2 , 125.0 , 123.5 , 121.8 , 120.0 , 119.1 , 111.0 , 104.5 , 39.6 , 34.4 , 31.4 .

HRMS (EI-TOF):  $m/z$  Calcd. for  $\text{C}_{27}\text{H}_{26}\text{N}_2$   $[\text{M}+\text{Na}]^+$ :378.5124, found 378.5087.

**3,3'-((4-chlorophenyl)methylene)bis(2-methyl-1H-indole)(3p):**

Yield: 0.3686g (96%) ; red solid; m p 162°C-163°C.

$^1\text{H}$  NMR (300 MHz,  $\text{CDCl}_3$ )  $\delta$  7.78 (s, 2H), 7.28 (s, 2H), 7.24 (d,  $J$  = 8.9 Hz, 4H), 7.07 (t,  $J$  = 7.4 Hz, 2H), 7.00 (d,  $J$  = 7.8 Hz, 2H), 6.94 – 6.86 (m, 2H), 5.98 (s, 1H), 2.07 (s, 6H).

$^{13}\text{C}$  NMR (75 MHz,  $\text{CDCl}_3$ )  $\delta$  135.0 , 131.8 , 130.4 , 129.3 , 128.2 , 120.7 , 119.2 , 112.9 , 110.0 , 104.6 , 38.7 , 12.4 .

HRMS (EI-TOF):  $m/z$  Calcd. for  $\text{C}_{25}\text{H}_{21}\text{N}_2\text{Cl}$   $[\text{M}+\text{Na}]^+$ :384.1400, found 384.1389.

**3,3'-((4-chlorophenyl)methylene)bis(5-methyl-1H-indole)(3q):**

Yield:0.3763g (98%); red solid; m p 148°C-150°C.

$^1\text{H}$  NMR (300 MHz,  $\text{CDCl}_3$ )  $\delta$  7.76 (s, 2H), 7.24 (d,  $J$  = 9.2 Hz, 6H), 7.18 (s, 2H), 7.03 (d,  $J$  = 8.2 Hz,

2H), 6.56 (s, 2H), 5.81 (s, 1H), 2.38 (s, 6H).

<sup>13</sup>C NMR (75 MHz, CDCl<sub>3</sub>) δ 143.2, 134.2, 131.7, 131.3, 128.8, 128.4, 127.3, 124.0, 122.9, 119.3, 119.0, 110.6, 40.3, 21.2

HRMS (EI-TOF): m/z Calcd. for C<sub>25</sub>H<sub>21</sub>N<sub>2</sub>Cl[M+Na]<sup>+</sup>:384.1400, found 384.1389.

**3,3'-((4-chlorophenyl)methylene)bis(5-methoxy-1H-indole)(3r):**

Yield: 0.3661g (88%); pink solid; m p 155°C-157°C.

<sup>1</sup>H NMR (300 MHz, CDCl<sub>3</sub>) δ 7.84 (s, 2H), 7.27 (d, *J* = 5.1 Hz, 4H), 7.23 (s, 2H), 6.95 – 6.76 (m, 4H), 6.63 (s, 2H), 5.77 (s, 1H), 3.73 (s, 6H).

<sup>13</sup>C NMR (75 MHz, CDCl<sub>3</sub>) δ 153.8 , 142.5, 134.7 , 130.1 , 128.3 , 127.3 , 124.4 , 118.7 , 112.0 , 111.8 , 110.9 , 102.0 , 55.9 , 39.7 .

HRMS (EI-TOF): m/z Calcd. for C<sub>25</sub>H<sub>21</sub>N<sub>2</sub>O<sub>2</sub>Cl[M+Na]<sup>+</sup>:416.1299 found 416.1301.

**3,3'-((4-chlorophenyl)methylene)bis(5-chloro-1H-indole)(3s):**

Yield:0.3816g (90%); pink solid; m p 175°C-176°C.

<sup>1</sup>H NMR (300 MHz, CDCl<sub>3</sub>) δ 7.96 (s, 2H), 7.30 (d, *J* = 7.2 Hz, 4H), 7.26 (s, 2H), 7.22 (d, *J* = 8.5 Hz, 2H), 7.19 – 7.06 (m, 2H), 6.65 (s, 2H), 5.74 (s, 1H).

<sup>13</sup>C NMR (75 MHz, CDCl<sub>3</sub>) δ 141.3 , 136.8 , 128.7 , 128.6 , 127.4 , 127.2 , 124.2 , 121.2 , 120.8 , 119.6 , 113.7 , 112.2 , 34.8 .

HRMS (EI-TOF): m/z Calcd. for C<sub>23</sub>H<sub>15</sub>N<sub>2</sub>Cl<sub>3</sub>[M+Na]<sup>+</sup>:424.0311, found 424.0315.

**3,3'-((4-chlorophenyl)methylene)bis(1-methyl-1H-indole)(3t):**

Yield: 0.3571g (93%); white solid; m p 208°C-209°C.

<sup>1</sup>H NMR (400 MHz, DMSO-*d*<sub>6</sub>) δ 7.39 – 7.27 (m, 8H), 7.14 – 7.08 (m, 2H), 6.94 – 6.89 (m, 2H), 6.82 (s, 2H), 5.86 (s, 1H), 3.69 (s, 6H).

HRMS (EI-TOF): m/z Calcd. for C<sub>25</sub>H<sub>21</sub>N<sub>2</sub>Cl[M+Na]<sup>+</sup>:384.1422 found 384.1428.
